# Supplementary material for: A cytoplasmic quaking I isoform regulates the hnRNP F/H-dependent alternative splicing pathway in myelinating glia
Source: PubMed Central journal article supplement (PMC4066780; doi:10.1093/nar/gku353), 2014-05-03
Supplement: supp_gku353_Supplementary_Data.pdf [file supp_gku353_Supplementary_Data.pdf]

## Supplementary Figure 1.

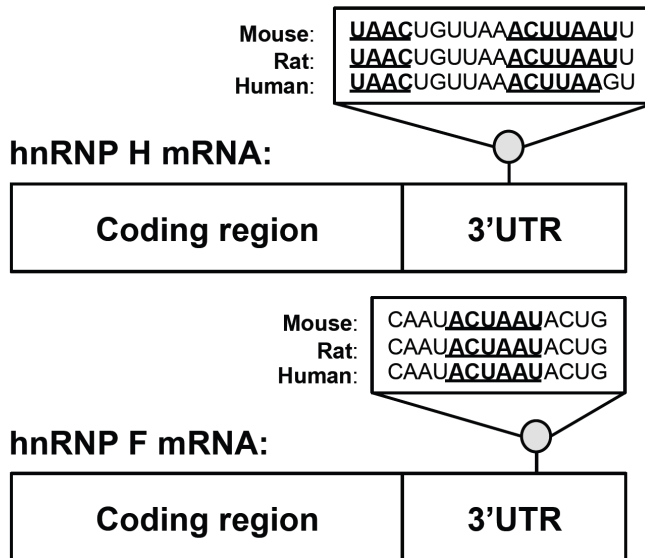

**Putative quaking response elements (QRE) are conserved between rodents and human.** The putative QREs are underlined in the 3' untranslated region (3'UTR) of mouse, rat and human hnRNP H and hnRNP F mRNAs.

## Supplementary Figure 2.

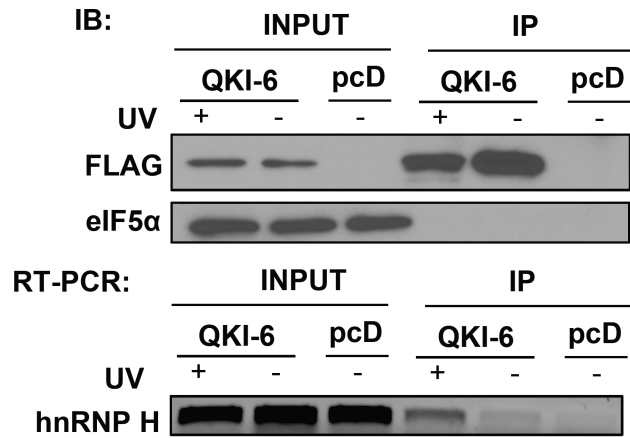

**Co-immunoprecipitation with QKI-6 by the hnRNP H mRNA under denaturing conditions is attenuated without UV crosslinking.** Immunoprecipitation from HOG cells transfected with FLAG-QKI-6 or pcDNA control was performed in the presence of 0.5% SDS, with or without UV crosslinking as indicated on top of the corresponding lanes. Before immunoprecipitation, cell lysates were subjected to ultracentrifugation at 77,000 xg for 20 min at 4°C. Immunoblots of IPs were probed with anti-FLAG antibody to detect FLAG-QKI-6 and anti-eIF5α antibody for loading control (top). hnRNP H mRNA in the input and IP was detected by RT-PCR (bottom).

### Supplementary Figure 3.

#### MAG pre-mRNA:

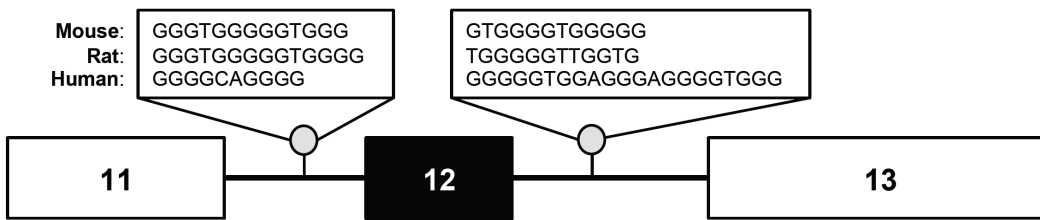

**G-run motifs are identified surrounding MAG Exon 12 in rodents and human.** Intronic G-runs are present within 250 base pairs upstream and downstream of the alternative Exon 12 in human, mouse, and rat MAG pre-mRNA.

## Supplementary Figure 4.

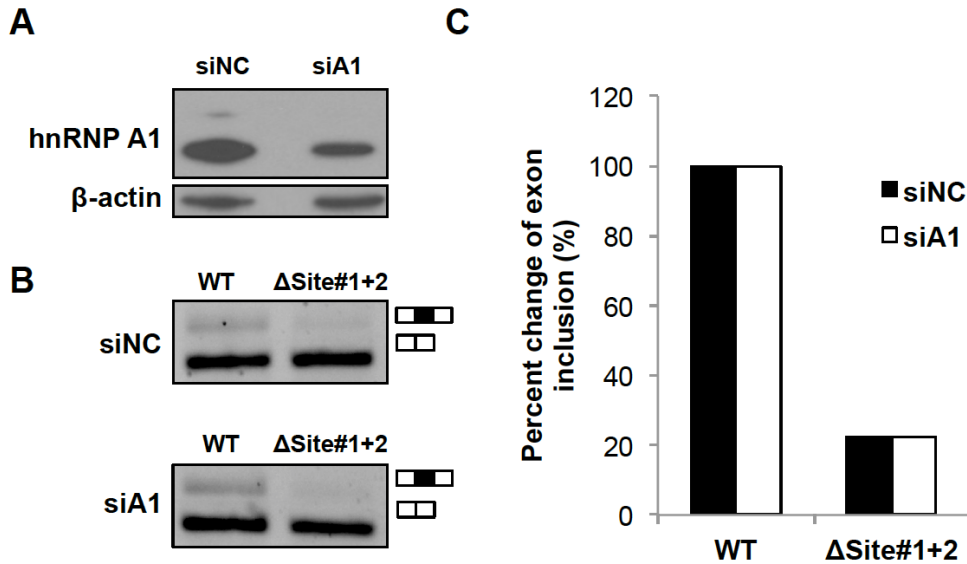

**Deletion of G-runs in the MAG minigene results in comparable reduction of Exon 12 inclusion regardless the knockdown of hnRNP A1.** (A) Immunoblot detects siRNA knockdown of hnRNP A1 (siA1) as compared to negative control siRNA (siNC) in CAD cells.  $\beta$ -actin was used as a loading control. (B) Representative image of semi-quantitative RT-PCR products of mRNA isoforms derived from AS of the MAG minigene reporter that carries wild type intronic G-runs (WT), or deletion of both G-runs ( $\Delta$ Site#1+2), upon treatment with siNC or siA1. (C) qRT-PCR detection of mRNA isoforms derived from AS of the WT or mutant MAG minigene reporter in response to siNC or siA1. % change of inclusion of the alternative exon is calculated and graphically displayed (n=2).

Supplementary Figure 5.

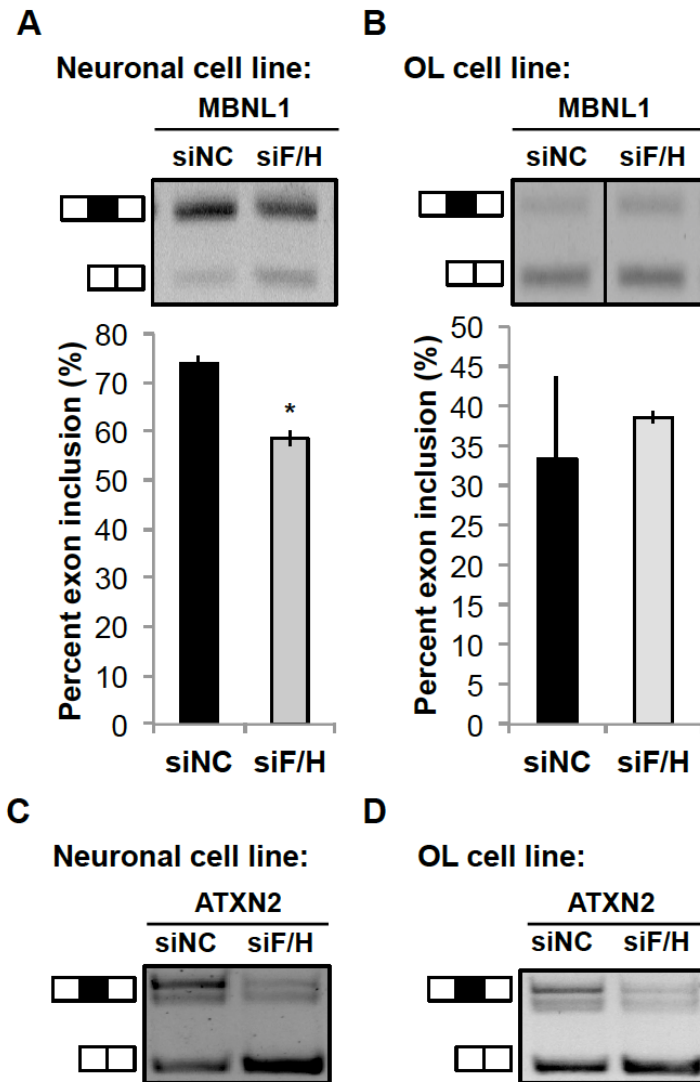

**hnRNP F/H-dependent alternative splicing of MBNL1 and ATXN2 in neuronal and OL cell lines.** (A) Semi-quantitative RT-PCR was performed using one primer set to simultaneously detect splice variants of MBNL1 in the neuronal cell line CAD upon siRNA knockdown of hnRNP F/H (siF/H) as compared to scrambled negative control siRNA (siNC). (B) Same experiment was performed in the OL cell line CG4. Representative images are shown in the top panels. The alternative exons in the PCR products are indicated in black and inclusion is depicted on the side of the corresponding bands. % inclusion of the alternative exon in each experiment is calculated and statistically compared between siF/H and siNC-treated cells in the bottom panels. (C,D) Representative image of semi-quantitative RT-PCR of ATXN2 upon knockdown of hnRNP F/H compared to scrambled negative control in the neuronal cell line CAD and the OL cell line CG4.

**Supplementary Table 1.**

| Gene name    | Gene Id (mouse) | mRNA in OLS | Splice variants in OLS | Abnormal AS in $qk^v/qk^v$ | hnRNP H CLIP-tag in HEK293T | Species/Cell-types examined from literature | References |
|--------------|-----------------|-------------|------------------------|----------------------------|-----------------------------|---------------------------------------------|------------|
| PLP          | 18823           | Yes         | Yes                    | Yes                        |                             | Mouse, Oli-neu                              | (25)       |
| MAG          | 17136           | Yes         | Yes                    | Yes                        |                             | Mouse                                       | This study |
| ENY2         | 223527          | Yes         | Yes                    | Yes                        |                             | Mouse, Oli-neu                              | (28)       |
| ZASP/LDB3    | 24131           | Yes         | Yes                    | Yes                        |                             | Human, Skmc                                 | (33)       |
| UAP1         | 107652          | Yes         | Yes                    | Yes                        |                             | Human, HeLa                                 | (37)       |
| MPZL1        | 68481           | Yes         | Yes                    | Yes                        |                             | Human, HeLa                                 | (37)       |
| ATXN2        | 20239           | Yes         | Yes                    | Yes                        | ✓                           | Human, HEK293T                              | (37)       |
| NF2          | 18016           | Yes         | Yes                    | Yes                        |                             | Human, HeLa                                 | (38)       |
| SIRT2        | 64383           | Yes         | Yes                    | No                         | ✓                           | Human, HEK293T                              | (38)       |
| MBNL1        | 56758           | Yes         | Yes                    | No                         |                             | Human, Skmc                                 | (33)       |
| MBNL2        | 105559          | Yes         | Yes                    | No                         |                             | Human, Skmc; mouse Oli-neu                  | (33) (37)  |
| SMC2         | 14211           | Yes         | Yes                    | No                         |                             | Mouse, Oli-neu                              | (28)       |
| ELP3         | 74195           | Yes         | Yes                    | No                         |                             | Mouse, Oli-neu                              | (28)       |
| NFIB         | 18028           | Yes         | Yes                    | No                         |                             | Mouse, Oli-neu                              | (28)       |
| MADD         | 228355          | Yes         | Yes                    | No                         | ✓                           | Human, HEK293T, HeLa, U373                  | (27) (38)  |
| PTB          | 19205           | Yes         | Yes                    | No                         |                             | Mouse                                       | This study |
| nPTB         | 56195           | Yes         | Yes                    | No                         |                             | Mouse                                       | This study |
| FGFR2        | 14182           | Yes         | No                     | No                         |                             | Human, HEK293T                              | (36)       |
| TPM1         | 22003           | Yes         | No                     | No                         |                             | Human, HeLa                                 | (37)       |
| BAT2 Domain  | 226562          | Yes         | Yes                    | N/A                        |                             | Mouse, Oli-neu                              | (28)       |
| DDEF1        | 13196           | Yes         | Yes                    | N/A                        |                             | Mouse, Oli-neu                              | (28)       |
| DSCR3 (CG4)  | 13185           | Yes         | No                     | N/A                        | ✓                           | Human, HEK293T                              | (38)       |
| HGS (CG4)    | 15239           | Yes         | No                     | N/A                        | ✓                           | Human, HEK293T                              | (38)       |
| TARBP2 (CG4) | 21357           | Yes         | No                     | N/A                        | ✓                           | Human, HEK293T                              | (38)       |
| TRMU (CG4)   | 72026           | Yes         | No                     | N/A                        | ✓                           | Human, HEK293T                              | (38)       |
| MAST1 (CG4)  | 56527           | Yes         | No                     | N/A                        | ✓                           | Human, HEK293T                              | (38)       |

**Supplementary Table 2.**

| Primer List                               |                                            |
|-------------------------------------------|--------------------------------------------|
| Name of Target                            | Sequence                                   |
| Actin                                     | F:TGTTACCAACTGGGACGACA                     |
|                                           | R:GGGGTGTGAAGGTCTCAAA                      |
| ATXN2                                     | F:GTTTCAGCACCATCAGCACCAG                   |
|                                           | R:GGAGGGGATTTGGCCTTTTCG                    |
| DSCR3                                     | F:CGTGCTGAAGCCAGGAAAGATT                   |
|                                           | R:AGCTCTCTCTTTGACGTTCTGC                   |
| FGFR2                                     | F:CCTCCACGGTGGTCGGAG                       |
|                                           | R:GGGGGATGCGCTTGGTCAG                      |
| HGS                                       | F:GTCAGGGGGACACACAAGCA                     |
|                                           | R:GGGCTCTTTTCAGCAGCGAAC                    |
| hnRNP F 3'UTR M/R                         | F:GAGTTAAGTAGTTAAGTATGTTGAGTG              |
|                                           | R:GTCAAGGCCTCACCAATTCCTAC                  |
| hnRNP F qPCR M/R                          | F:GACCACAGATATGGAGACAGCG                   |
|                                           | R:GTAGCAAACCTCAACATCAGCTTCTC               |
| hnRNP H 3'UTR/qPCR M/R                    | F:ATTGCATAGGTAGCCAAGGAGCA                  |
|                                           | R:GGCATAAAAACCACAAGGCTGGAT                 |
| hnRNP F 3'UTR H                           | F:TTGAGAATTGAGACACAATACTAATAC              |
|                                           | R:AGTAATCTGTGCCAGTCATTGTG                  |
| hnRNP H 3'UTR H                           | F:TCATCTAGGATGTAACAGTGAAGC                 |
|                                           | R:TGTTCAATTTAACGTGGCAAAGGG                 |
| hnRNP H 3'UTR Cloning primers             | F:GGATCTCTTACAGGTAGCCAAG                   |
|                                           | R:ACATCAAGTTCACAGGACACTAA                  |
| hnRNP H 3'UTR nested cloning primers      | F:CGCGCTCGAGGTAATGGAAGCCGAGCATCT           |
|                                           | R:CGCGCTAGACAAGGTTCACTTAGCGCAATAC          |
| hnRNP H putative QRE mutagenesis primers  | F:gagcaaaagctgagtgaactgtcctagcttttcttagtta |
|                                           | R:taactagagaaaagctaggacagttcactcagctttgctc |
| hnRNP H reporter                          | F:AAGAGATCGTGGATTACGTCGCCA                 |
|                                           | R:GGCATAAAAACCACAAGGCTGGAT                 |
| MADD                                      | F:TTGCTAGCAGCCTGTATCGGAA                   |
|                                           | R:GGTTCTCGCTAGAGTTGCTCG                    |
| MAG endogenous specific                   | F:GTGCTGTGGTCGCCTTTGCC                     |
|                                           | R:CCCTCACCCCTACTACTCTC                     |
| MAGmini specific                          | F:GGATCACTCTCGGCATGGAC                     |
|                                           | R:GTCTGAGTGGGAATAACTGAGG                   |
| MAGmini G-run site #1 mutagenesis primers | F:aggatggcaaggttgctaaacaaaagggaggcc        |
|                                           | R:ggcctccctttttgtagcaaccttgccatcct         |
| MAGmini G-run site #2 mutagenesis primers | F:ccctattgtgtgtccaatgctatcaggagtagagagc    |
|                                           | R:gctctactcctgatagcattggacacacaataggg      |
| MAST1                                     | F:CCACTTAGGTAGCAGTCCTTTG                   |
|                                           | R:CCTTTGGGAACCGCTCCTTG                     |
| MBNL2                                     | F:AGGACTGATAAACTGGAGGTATG                  |
|                                           | R:TCTTTGGTAAGGGATGAAGAGCA                  |
| MPZL1                                     | F:CTCCACGTGGTGGAAATAGACAA                  |
|                                           | R:GAGTCTCAAGGCCACATGC                      |
| NF2                                       | F:GAGGAGCCCATGAACCCAATC                    |
|                                           | R:GGAGCAGCAGATGTGGCAGG                     |
| UAP1                                      | F:GCAAAGAAGTTTGTGGTGTATG                   |
|                                           | R:ATAACCTTCAAGGCCCTCTC                     |
| SIRT2                                     | F:CGGGACAGAGCAGTCGGTGA                     |
|                                           | R:GGCAGATGGTTGGCTTGAAGT                    |
| TARBP2                                    | F:GCGTTTGGCCAGAGTACATGGT                   |
|                                           | R:CAGTTCCTCAATATCCAGATAGC                  |
| TRMU                                      | F:AGGGTGACGTGCTTGTGGCT                     |
|                                           | R:CTTACCCTTCTGGAGTGTGTAG                   |
| TPM1                                      | F:GGCGGAAGACCGGAGCA                        |
|                                           | R:CATGCCTCTCTACTCTCATCT                    |
| Zasp/LBD3                                 | F:ATGACCGGGACAGAATACATGC                   |
|                                           | R:GCAGGCACTGGCTGGTAGA                      |
